# Supplementary material
Source: Springer Nature journal article supplement (https://www.springermedizin.de/resource/supplementary/12986_2014_592_MOESM2_ESM.pdf/25655092)

# TLR4, MyD88 and TRAF6 mRNA Levels

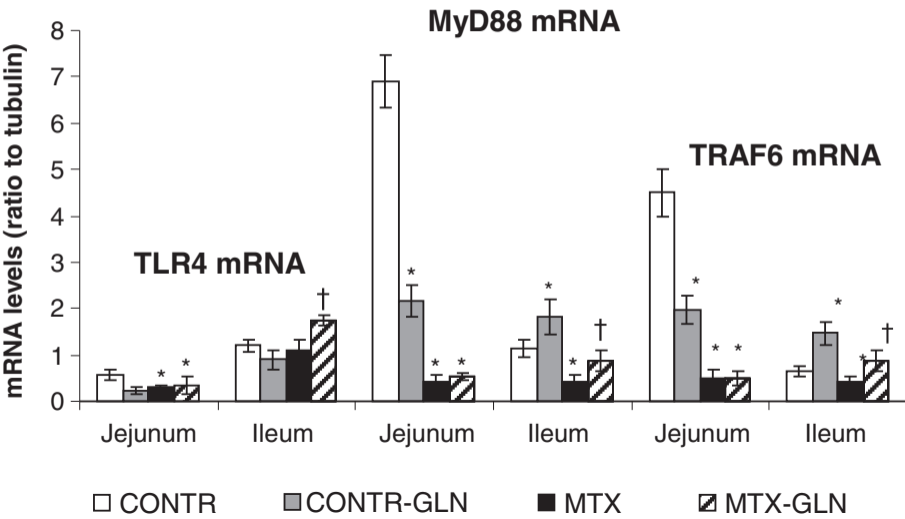

Supplement: MOESM2 [file 25655092]
